# Supplementary material for: Molecular Fingerprint of BMD Patients Lacking a Portion in the Rod Domain of Dystrophin
Source: MDPI journal article supplement (doi:10.3390/ijms23052624), 2022-02-27

**Supplementary Figure S1.** Full-length immunoblot images. Vastus lateralis muscle protein extracts (50  $\mu$ g) from 4 DMD, 4 BMD1 and 4 BMD2 patients were resolved on 10% and 8-12% gradient polyacrylamide gels. Band intensities were normalized against the total amount of proteins stained by Sypro ruby total-protein stain.

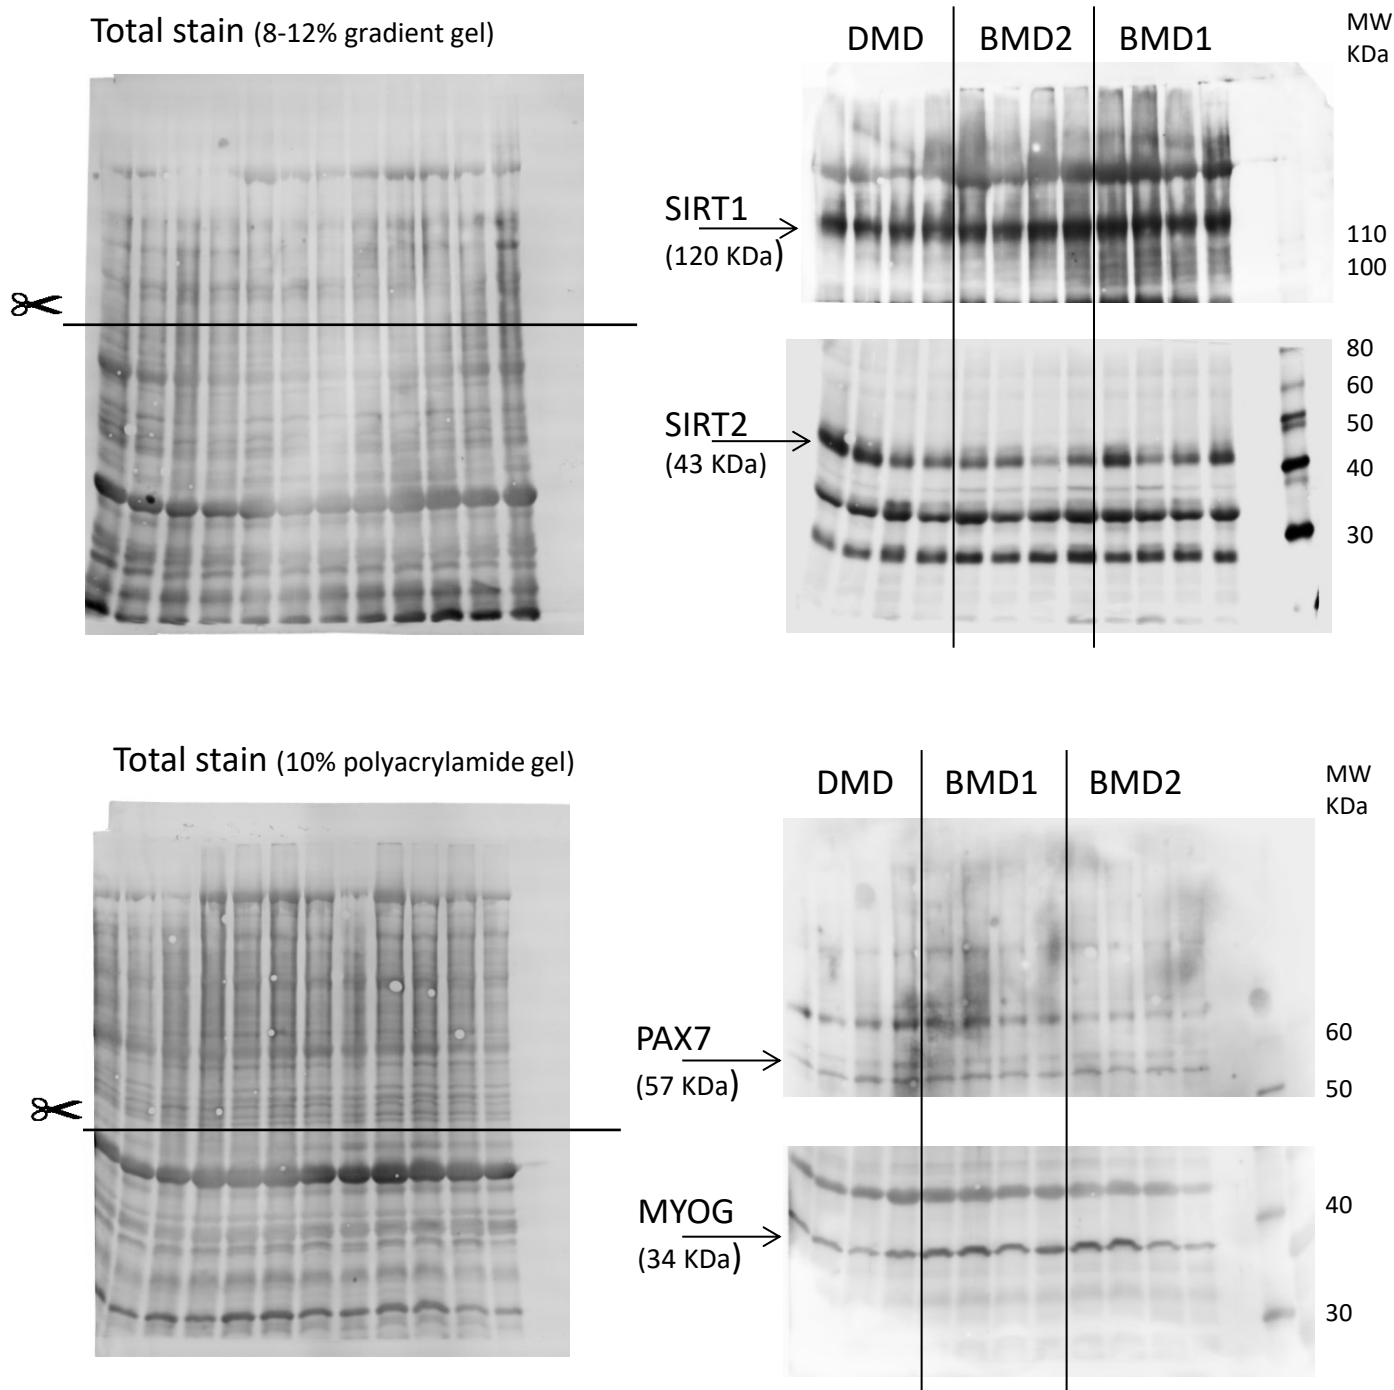

Supplement: s1 [file s1]
