# Supplementary material for: Molecular Fingerprint of BMD Patients Lacking a Portion in the Rod Domain of Dystrophin
Source: Int J Mol Sci. 2022 Feb 27;23(5):2624. doi: 10.3390/ijms23052624 (PMC8910510; doi:10.3390/ijms23052624)
Supplement: Supplementary file 1 [file ijms-23-02624-s001.zip › Supplementary Table S3 - Patients.xlsx]

## Sheet: Foglio1
Supplementary Table S3. Patients involved in the proteomic studies
Diagnosis	ID (as reported in [11])	Age	Genotyping (if present)	Ambulant	Treatment with corticosteroids	B blockers	ACE inhibitors
DMD	2	3		yes	no	no	no
DMD	3	6	del 50	yes	no	no	no
DMD	6	8	del 3-6	yes	no	no	no
DMD	15	6	del 44	yes	no	no	no
BMD1	18	4	del 3-8	yes	no	no	no
BMD1	19	6	del 48	yes	no	no	no
BMD1	20	6		yes	no	no	no
BMD1	24	3		yes	no	no	no
BMD2	22	7	del 48-51	yes	no	no	no
BMD2	28	3	del 48-51	yes	no	no	no
BMD2	29	5	del 48	yes	no	no	no
BMD2	30	9	del 48	yes	no	no	no
