# Supplementary material for: Molecular Fingerprint of BMD Patients Lacking a Portion in the Rod Domain of Dystrophin
Source: Int J Mol Sci. 2022 Feb 27;23(5):2624. doi: 10.3390/ijms23052624 (PMC8910510; doi:10.3390/ijms23052624)
Supplement: Supplementary file 1 [file ijms-23-02624-s001.zip › Supplementary Tables S1, S2 - Protein datasets.xlsx]

## Sheet: Supplementary Table S1
Supplementary Table S1. Changed proteins in label-free LC-ESI-MS/MS analysis
Gene name	Protein name	UniprotKB Entry	Student's T-test p-value	Student's T-test q-value	Log2 Fold change BMD2/BMD1	N: Peptides	N: Razor + unique peptides	N: Unique peptides	N: Sequence coverage [%]	N: Unique + razor sequence coverage [%]	N: Unique sequence coverage [%]	N: Mol. weight [kDa]	N: Q-value	N: Score	N: Intensity	N: MS/MS count
ACTG1	Actin, cytoplasmic 2	P63261	0.00740502	0.0284638	0.330928	22	7	1	62.9	34.7	4.5	41.792	0	103.08	2007100000	159
ACTN2	Alpha-actinin-2	P35609	0.001807	0.0125882	-0.352107	58	58	40	67.4	67.4	50.2	103.85	0	323.31	70473000000	9376
ADSSL1	Adenylosuccinate synthetase isozyme 1	Q8N142	0.000188103	0.00329412	0.5797	11	11	11	31.3	31.3	31.3	50.208	0	24.406	224410000	185
AHNAK	Neuroblast differentiation-associated protein AHNAK	Q09666	0.00578281	0.0239344	-1.10742	72	72	72	32.1	32.1	32.1	629.09	0	137.21	748130000	390
AHSG	Alpha-2-HS-glycoprotein	P02765	0.000180814	0.00325	0.910328	5	5	4	16	16	14.1	39.411	0	36.456	104240000	41
AMPD1	AMP deaminase 1	P23109	5.2153e-09	0	1.1309	18	18	18	30.2	30.2	30.2	89.762	0	53.492	564780000	233
ANKRD2	Ankyrin repeat domain-containing protein 2	Q9GZV1	0.0102793	0.034716	-0.97493	12	12	12	48.6	48.6	48.6	37.121	0	30.374	403520000	148
ANXA6	Annexin A6	P08133	0.00494282	0.0227407	-0.188304	29	29	29	49.5	49.5	49.5	75.872	0	136.52	1198300000	379
APOA4	Apolipoprotein A-IV	P06727	0.00784612	0.0292394	-0.664561	5	5	5	13.1	13.1	13.1	45.371	0	7.7197	56855000	32
ATP2A2	Sarcoplasmic/endoplasmic reticulum calcium ATPase 2	P16615	0.0035784	0.0184167	-0.268975	47	47	28	53.7	53.7	34.8	109.69	0	323.31	25240000000	4082
ATP5A1	ATP synthase subunit alpha, mitochondrial	P25705	0.000112733	0.002	0.342707	23	23	1	49.4	49.4	2.4	59.75	0	323.31	7797500000	1318
ATP5C1	ATP synthase subunit gamma, mitochondrial	P36542	0.00713848	0.0283636	0.504186	8	8	8	28.6	28.6	28.6	32.881	0	33.458	528180000	166
ATP5D	ATP synthase subunit delta, mitochondrial	P30049	0.00754626	0.0284571	0.751543	2	2	2	13.7	13.7	13.7	17.49	0	13.162	653650000	123
ATP5H	ATP synthase subunit d, mitochondrial	O75947	0.000100055	0.00215385	0.490582	7	7	7	51.6	51.6	51.6	18.491	0	22.118	947370000	253
CA2	Carbonic anhydrase 2	P00918	0.0110282	0.0363373	0.88038	6	6	6	28.8	28.8	28.8	29.246	0	13.437	245860000	85
CA3	Carbonic anhydrase 3	P07451	4.69833e-06	0.00333333	-0.856008	15	15	15	68.1	68.1	68.1	29.557	0	171.23	42858000000	2259
CD59	CD59 glycoprotein	P13987	0.0158728	0.0487912	-0.320854	2	2	2	20.4	20.4	20.4	11.985	0.0015504	5.16	96747000	33
CDC42	Cell division control protein 42 homolog	P60953	0.00324934	0.0172174	0.807635	3	2	2	19.9	14.1	14.1	21.258	0	9.6571	56590000	52
CKMT2	Creatine kinase S-type, mitochondrial	P17540	0.0148495	0.0462472	0.460193	18	18	18	59.9	59.9	59.9	47.504	0	167.99	2461000000	991
COL6A1	Collagen alpha-1(VI) chain	P12109	0.0103931	0.0347317	-0.53393	22	22	22	30.3	30.3	30.3	108.34	0	146.34	995950000	301
CS	Citrate synthase, mitochondrial	O75390	0.0087368	0.0305263	0.311672	12	12	12	24.3	24.3	24.3	50.431	0	59.755	1092100000	427
CSRP3	Cysteine and glycine-rich protein 3	P50461	9.60882e-07	0.004	-0.975235	10	10	10	58.8	58.8	58.8	20.969	0	89.546	3803700000	421
DLD	Dihydrolipoyl dehydrogenase, mitochondrial	P09622	0.00342419	0.0181277	0.279692	10	10	10	21.4	21.4	21.4	54.177	0	17.867	306630000	168
DYSF	Dysferlin	O75923	0.00189612	0.0125714	-0.657927	25	25	25	15.9	15.9	15.9	237.29	0	58.301	221620000	129
ECH1	Delta(3,5)-Delta(2,4)-dienoyl-CoA isomerase, mitochondrial	Q13011	0.00721613	0.0283582	-0.513534	10	10	10	36.6	36.6	36.6	35.816	0	39.032	533250000	120
ECHS1	Enoyl-CoA hydratase, mitochondrial	P30084	0.000427213	0.00504348	0.624632	12	12	12	57.2	57.2	57.2	31.387	0	50.796	458720000	194
EEF1A2	Elongation factor 1-alpha 2	Q05639	0.00733532	0.0285294	-0.439453	16	16	8	42.9	42.9	24.8	54.34	0	109.65	2526700000	295
ENO3	Beta-enolase	P13929	0.0136702	0.0427727	0.496366	21	21	18	62	62	49.3	46.986	0	233.87	14462000000	1672
ESD	S-formylglutathione hydrolase	P10768	0.000268414	0.0042	0.588657	7	7	7	41.6	41.6	41.6	28.995	0	23.685	288090000	111
ETFA	Electron transfer flavoprotein subunit alpha, mitochondrial	P13804	0.0117803	0.0378353	0.439441	14	14	14	58.3	58.3	58.3	35.079	0	26.705	413810000	197
FHL1	Four and a half LIM domains protein 1	Q13642	0.0115133	0.0375238	-0.458425	24	24	24	74	74	74	33.578	0	205.3	41802000000	2971
FHL3	Four and a half LIM domains protein 3	Q13643	0.000713205	0.00661538	0.37111	11	11	11	61.8	61.8	61.8	31.192	0	42.718	677060000	194
FLNC	Filamin-C	Q14315	8.45185e-05	0.00233333	-0.274049	132	132	123	63.7	63.7	60.4	287.28	0	323.31	31177000000	6070
GC	Vitamin D-binding protein	P02774	0.000940501	0.00670968	0.483525	8	8	8	26.3	26.3	26.3	53.02	0	13.196	153950000	59
GOT2	Aspartate aminotransferase, mitochondrial	P00505	0.00785358	0.0288333	0.226017	16	16	16	37.4	37.4	37.4	47.517	0	114.56	1601400000	385
HBA1	Hemoglobin subunit alpha	P69905	0.00662406	0.0270625	0.734812	11	11	4	73.9	73.9	24.6	15.257	0	128.47	58992000000	3060
HIST1H4A	Histone H4	P62805	0.00311553	0.0172727	-0.571767	7	7	7	57.3	57.3	57.3	11.367	0	46.455	2766200000	417
HSPA1B	Heat shock 70 kDa protein 1B	P0DMV9	0.0022511	0.0138462	-0.860126	26	22	12	53.9	48	28.2	70.108	0	171.17	1931600000	511
HSPA9	Stress-70 protein, mitochondrial	P38646	0.00979833	0.0326	0.396792	17	17	17	31.7	31.7	31.7	73.68	0	40.165	211670000	124
HSPB1	Heat shock protein beta-1	P04792	0.00214547	0.0129474	-0.318853	14	14	14	82.4	82.4	82.4	22.782	0	160.03	5439200000	998
HSPB2	Heat shock protein beta-2	Q16082	0.000358502	0.00490909	-0.717921	5	5	5	48.4	48.4	48.4	20.232	0	22.368	261770000	108
HSPG2	Basement membrane-specific heparan sulfate proteoglycan core protein	P98160	0.00150231	0.0110303	-1.01935	56	56	56	18.1	18.1	18.1	468.83	0	162.81	566690000	336
IGHA1	Ig alpha-1 chain C region	P01876	0.0067648	0.0270769	0.708617	6	6	6	19.3	19.3	19.3	42.848	0	10.029	90913000	48
IGHG1	Ig gamma-1 chain C region	P01857	0.00121008	0.00925	0.698766	13	13	6	45.4	45.4	26.1	43.911	0	94.796	4633700000	762
IGKC	Ig kappa chain C region	P01834	4.52398e-06	0.004	1.20767	6	6	6	82.2	82.2	82.2	11.765	0	93.62	1669700000	546
KLHL40	Kelch-like protein 40	Q2TBA0	0.00201339	0.0125405	-0.422387	15	15	15	27.1	27.1	27.1	69.257	0	31.9	337920000	112
KLHL41	Kelch-like protein 41	O60662	0.00198527	0.0127778	-0.398947	25	25	16	46.7	46.7	27.6	68.036	0	218.98	4802200000	953
LDHA	L-lactate dehydrogenase A chain	P00338	0.00371639	0.0185306	0.551644	19	19	18	55.4	55.4	51.8	36.688	0	103.75	4109900000	647
LGALS1	Galectin-1	P09382	0.00476835	0.0228462	-0.451319	8	8	8	64.4	64.4	64.4	14.716	0	37.048	1794500000	318
LMCD1	LIM and cysteine-rich domains protein 1	Q9NZU5	0.0025663	0.0156098	-0.613554	21	21	21	66	66	66	40.832	0	83.131	722020000	219
MAP4	Microtubule-associated protein	E7EVA0	5.89367e-05	0.0028	-0.978859	29	29	29	20.4	20.4	20.4	245.44	0	46.709	180680000	116
MT-CO2	Cytochrome c oxidase subunit 2	P00403	0.000496066	0.005	0.44764	5	5	5	27.8	27.8	27.8	25.565	0	20.595	1434800000	274
MYBPC1	Myosin-binding protein C, slow-type	Q00872	0.00500475	0.0225455	-0.192877	70	70	3	64	64	3.1	131.69	0	323.31	47570000000	6939
MYH1	Myosin-1	P12882	0.000816842	0.00628571	1.256	163	53	35	65.7	26.6	17.6	223.14	0	323.31	50229000000	6232
MYH2	Myosin-2	Q9UKX2	0.00574835	0.0244746	0.247602	171	135	47	65.8	55.6	22.9	223.04	0	323.31	306070000000	26059
MYH7	Myosin-7	P12883	0.000345671	0.00514286	-0.326415	189	189	63	69.3	69.3	27.9	223.09	0	323.31	918570000000	50486
MYL3	Myosin light chain 3	P08590	0.000930876	0.00693333	-0.385366	17	17	15	80.5	80.5	68.7	21.932	0	248.66	96203000000	4276
MYL6B	Myosin light chain 6B	P14649	2.69151e-06	0.00666667	-1.50776	16	16	13	75.5	75.5	63.9	22.764	0	75.584	5966700000	567
MYOM3	Myomesin-3	Q5VTT5	5.51593e-06	0.00285714	-0.537107	52	52	52	47.7	47.7	47.7	162.19	0	186.06	2784500000	781
MYOT	Myotilin	Q9UBF9	0.00944933	0.0321538	-0.36836	27	27	27	64.5	64.5	64.5	55.394	0	166.21	3929300000	811
MYOZ1	Myozenin-1	Q9NP98	0.00310961	0.0176744	0.444843	14	14	14	80.9	80.9	80.9	31.744	0	100.13	3895500000	850
MYOZ2	Myozenin-2	Q9NPC6	0.000826581	0.00606897	-0.956089	13	13	13	64	64	64	29.898	0	40.35	1008400000	187
NDUFA2	NADH dehydrogenase [ubiquinone] 1 alpha subcomplex subunit 2	O43678	0.0120483	0.038186	0.402262	3	3	3	40.4	40.4	40.4	10.921	0	13.751	118170000	46
NDUFS3	NADH dehydrogenase [ubiquinone] iron-sulfur protein 3, mitochondrial	O75489	0.00947701	0.0318481	0.675296	6	6	6	31.1	31.1	31.1	30.241	0	13.105	165940000	97
NDUFV2	NADH dehydrogenase [ubiquinone] flavoprotein 2, mitochondrial	P19404	0.000521786	0.0056	0.637458	5	5	5	25	25	25	27.907	0	13.224	110890000	78
NEB	Nebulin	P20929	4.40711e-06	0.005	-0.174488	365	365	3	62.5	62.5	0.3	986.67	0	323.31	56610000000	10938
OBSCN	Obscurin	Q5VST9	0.00555149	0.0247857	-0.418005	136	136	20	22.1	22.1	3.4	972.99	0	323.31	2077000000	977
P4HB	Protein disulfide-isomerase	P07237	0.00878688	0.0304416	-0.619035	15	15	15	36.6	36.6	36.6	57.116	0	34.407	200340000	100
PDLIM3	PDZ and LIM domain protein 3	Q53GG5	0.00565496	0.0244828	-0.299276	18	18	3	68.1	68.1	13.5	39.232	0	136.6	2581400000	493
PHB	Prohibitin	P35232	0.00788104	0.0284932	0.319493	11	11	11	48.2	48.2	48.2	29.804	0	28.402	187450000	91
PHPT1	14 kDa phosphohistidine phosphatase	Q9NRX4	8.05551e-05	0.00254545	1.04398	3	3	3	34.7	34.7	34.7	13.671	0	25.234	1023800000	87
PKM	Pyruvate kinase PKM	P14618	0.00555668	0.0243509	0.357874	31	31	4	62	62	9.8	58.061	0	323.31	8614400000	1626
PLEC	Plectin	Q15149	0.00594676	0.0247742	-0.288463	167	167	2	42.7	42.7	0.4	512.6	0	323.31	4062400000	1459
PPIA	Peptidyl-prolyl cis-trans isomerase A	P62937	0.00023179	0.00315789	-0.658759	8	8	8	63.6	63.6	63.6	18.012	0	21.627	579810000	155
PRDX2	Peroxiredoxin-2	P32119	0.000191221	0.00311111	0.734434	11	10	10	54.5	49	49	21.892	0	67.249	2537600000	387
RPLP2	60S acidic ribosomal protein P2	P05387	0.00483849	0.022717	-0.308852	4	4	4	60	60	60	11.665	0	7.7875	110490000	35
RPSA	40S ribosomal protein SA	C9J9K3	0.0125482	0.0393103	-0.355752	7	7	7	36.5	36.5	36.5	29.404	0	13.534	81056000	54
SH3BGR	SH3 domain-binding glutamic acid-rich protein	P55822	0.015203	0.0467556	0.359672	4	4	4	20.9	20.9	20.9	30.917	0	33.475	320940000	111
SLC25A3	Phosphate carrier protein, mitochondrial	Q00325	0.00578097	0.0243333	0.405429	7	7	7	18.3	18.3	18.3	39.958	0	15.024	590790000	152
SPTAN1	Spectrin alpha chain, non-erythrocytic 1	Q13813	0.00321648	0.0173333	0.845807	16	16	16	9.2	9.2	9.2	282.83	0	63.336	149550000	61
SYNPO2L	Synaptopodin 2-like protein	Q9H987	0.00264223	0.0154286	-0.628018	15	15	15	31.6	31.6	31.6	79.145	0	47.52	293120000	111
TNNC2	Troponin C, skeletal muscle	P02585	0.00863126	0.0307027	0.704867	15	15	14	71.9	71.9	67.5	18.122	0	297.51	9508800000	1636
TNNI1	Troponin I, slow skeletal muscle	P19237	3.67974e-05	0.00222222	-0.845548	11	11	11	44.4	44.4	44.4	21.691	0	187.42	21301000000	1951
TNNI2	Troponin I, fast skeletal muscle	P48788	0.00868706	0.03056	0.928817	8	8	8	42.3	42.3	42.3	21.321	0	217.49	3514900000	771
TPM1	Tropomyosin 1 (Alpha), isoform CRA_f	Q6ZN40	0.00661854	0.0274921	0.251384	31	31	0	56.4	56.4	0	37.452	0	323.31	50685000000	2521
TTN	Titin	Q8WZ42	0.00418962	0.01992	-0.112457	1737	1737	36	57.8	57.8	1.8	3994.6	0	323.31	285390000000	58158
TUBA4A	Tubulin alpha-4A chain	P68366	0.00236786	0.0143	-0.662305	15	15	4	49.2	49.2	12.5	48.328	0	112.93	845910000	241
TUFM	Elongation factor Tu, mitochondrial	P49411	0.000799136	0.00651852	0.439578	16	16	16	40.5	40.5	40.5	49.541	0	55.46	454010000	172
UQCRFS1	Cytochrome b-c1 complex subunit Rieske, mitochondrial	P47985	0.000138493	0.00266667	0.460382	10	10	10	42.3	42.3	42.3	29.668	0	46.117	783740000	279
YWHAG	14-3-3 protein gamma	P61981	0.00469872	0.0230588	0.532896	12	9	8	58.7	48.6	44.9	28.302	0	68.127	794360000	277
YWHAZ	14-3-3 protein zeta/delta	P63104	1.90135e-05	0.0025	0.787351	12	9	9	49.4	42.4	42.4	27.745	0	36.463	182950000	108
Legend:	protein identified also in 2-D DIGE dataset

## Sheet: Supplementary Table S2
Supplementary Table S2. Changed spots in 2-D DIGE analysis
Master spot number	Proteoform (from more to less acidic pI)	Gene name	Protein name	UniprotKB Entry	Student's T-test p-value	Log2 Fold change BMD2/BMD1	MW [kDa]	pI	Searched peptides	Matched Peptides	Mascot score	Sequence coverage [%]
977	a	ACTA1	Actin, alpha skeletal muscle	P68133	0.0249	0.176323	42	5.1	39	19	173	45.6
982	b	ACTA1	Actin, alpha skeletal muscle	P68133	0.0057	0.189034	42	5.1	22	12	163	37.1
1001	c	ACTA1	Actin, alpha skeletal muscle	P68133	0.0163	0.137504	42	5.1	36	19	193	46.4
1063	d	ACTA1	Actin, alpha skeletal muscle	P68133	0.0411	0.226509	42	5.1	18	14	199	35.5
1626		ACTA2	Actin, aortic smooth muscle	P62736	0.0184	-0.124328	16.7	5.2	11	6	67	29.1
421	a	ALB	Albumin	P02768	0.00943	-0.367371	69.3	5.9	26	17	188	25.8
431	b	ALB	Albumin	P02768	0.0145	-0.389567	65.2	6.1	43	19	192	37.4
1077	a	ALDOA	Fructose-bisphosphate aldolase A (EC 4.1.2.13)	P04075	0.012	0.432959	39.4	9.2	12	8	119	25.8
1078	b	ALDOA	Fructose-bisphosphate aldolase A (EC 4.1.2.13)	P04075	0.0121	0.516015	39.4	9.2	33	17	225	47.8
1083	c	ALDOA	Fructose-bisphosphate aldolase A (EC 4.1.2.13)	P04075	0.0163	0.454176	39.4	9.2	43	22	279	65.4
1090	d	ALDOA	Fructose-bisphosphate aldolase A (EC 4.1.2.13)	P04075	0.00981	0.326042	39.4	9.2	34	21	288	65.4
765	a	ATP5B	ATP synthase subunit beta (EC 7.1.2.2)	Q0QEN7	0.0184	0.275007	48.1	4.8	15	11	185	38.2
766	b	ATP5B	ATP synthase subunit beta (EC 7.1.2.2)	Q0QEN7	0.0213	0.226509	48.1	4.8	30	21	238	49.4
1564	a	CA3	Carbonic anhydrase 3 (EC 4.2.1.1)	P07451	0.00292	-0.367371	29.5	7.1	22	6	74.3	24.2
1605	b	CA3	Carbonic anhydrase 3 (EC 4.2.1.1)	P07451	0.00943	-0.31034	29.5	7.1	19	8	123	30.4
1557	c	CA3	Carbonic anhydrase 3 (EC 4.2.1.1)	P07451	0.0467	-0.214125	29.5	7.1	33	9	135	45.4
1024	a	CKM	Creatine kinase M-type (EC 2.7.3.2)	P06732	0.00957	0.669027	43.1	6.9	19	11	137	29.7
1028	b	CKM	Creatine kinase M-type (EC 2.7.3.2)	P06732	0.00861	0.632268	43.1	6.9	39	22	251	45.7
1031	c	CKM	Creatine kinase M-type (EC 2.7.3.2)	P06732	0.00979	0.62293	43.1	6.9	45	22	239	53.8
1854		CRYAB	Alpha-crystallin B chain	P02511	0.0295	-0.495695	20.1	6.9	33	12	165	50.3
858	a	ENO3	Beta-enolase (EC 4.2.1.11)	P13929	0.0216	0.485427	46.9	8.6	17	9	113	27.6
2028	b	ENO3	Beta-enolase (EC 4.2.1.11)	P13929	0.0255	0.454176	46.9	8.6	13	7	94.8	23.7
853	c	ENO3	Beta-enolase (EC 4.2.1.11)	P13929	0.031	0.219557	46.9	8.6	21	11	158	33.6
855	d	ENO3	Beta-enolase (EC 4.2.1.11)	P13929	0.0503	0.261442	46.9	8.6	21	11	135	28.6
1612		ETFB	Electron transfer flavoprotein subunit beta	P38117	0.0057	-0.464668	27.9	9.2	15	6	71.7	24.3
2033	a	GAPDH	Glyceraldehyde-3-phosphate dehydrogenase (GAPDH) (EC 1.2.1.12)	P04406	0.00292	0.0976108	36	9.1	11	6	87.5	28.7
2032	b	GAPDH	Glyceraldehyde-3-phosphate dehydrogenase (GAPDH) (EC 1.2.1.12)	P04406	0.0101	0.31034	36	9.1	27	12	182	44.2
2031	c	GAPDH	Glyceraldehyde-3-phosphate dehydrogenase (GAPDH) (EC 1.2.1.12)	P04406	0.0444	0.400538	36	9.1	32	12	131	35.8
2030	d	GAPDH	Glyceraldehyde-3-phosphate dehydrogenase (GAPDH) (EC 1.2.1.12)	P04406	0.834	-0.0129256	36.0	9.1	35	17	150	40.9
1064	a	GOT1	Aspartate aminotransferase, cytoplasmic (cAspAT) (EC 2.6.1.1) (EC 2.6.1.3)	P17174	0.0353	0.31034	46.2	6.6	9	7	105	17.4
1076	b	GOT1	Aspartate aminotransferase, cytoplasmic (cAspAT) (EC 2.6.1.1) (EC 2.6.1.3)	P17174	0.0184	0.464668	46.2	6.6	22	13	190	34.1
1750	a	KRT10	Keratin, type I cytoskeletal 10	P13645	0.0255	-0.238787	58.8	5	40	11	89	17.3
1398	b	KRT10	Keratin, type I cytoskeletal 10	P13645	0.00432	-0.344828	59.5	5	37	15	129	23.6
1462		LDB3	LIM domain-binding protein 3	O75112	0.0458	0.0840643	31	9.6	21	11	167	35
2037	a	MB	Myoglobin	P02144	0.0295	0.748461	17	8	11	5	84.9	38.6
1985	b	MB	Myoglobin	P02144	0.0464	0.31034	17.2	8	35	8	104	53.2
1792	a	MYL1	Myosin light chain 1/3, skeletal muscle isoform (MLC1F/MLC3F)	P05976	0.0252	-0.163499	21.1	4.8	12	5	80.7	43.8
1777	b	MYL1	Myosin light chain 1/3, skeletal muscle isoform (MLC1F/MLC3F)	P05976	0.0198	0.15056	21.1	4.8	31	15	224	73.2
1778		MYL3	Myosin light chain 3 (MLC1SB)	P08590	0.0135	-0.286881	21.9	4.9	29	10	159	56.9
1930		MYLPF	Myosin regulatory light chain 2, skeletal muscle isoform (MLC2B)	Q96A32	0.0192	0.516015	19	4.7	16	8	115	42
1038		PGK1	Phosphoglycerate kinase 1 (EC 2.7.2.3)	P00558	0.0444	0.443607	44.6	9.2	26	15	169	44.4
591	a	PKM	Pyruvate kinase PKM (EC 2.7.1.40)	P14618	0.0216	0.575312	58	8.7	20	15	182	20.5
592	b	PKM	Pyruvate kinase PKM (EC 2.7.1.40)	P14618	0.0137	0.62293	58	8.7	44	21	197	36.9
1813	a	PRDX1	Peroxiredoxin-1 (EC 1.11.1.24)	Q06830	0.05	0.15056	22.1	9.2	30	15	218	71.9
1808	b	PRDX1	Peroxiredoxin-1 (EC 1.11.1.24)	Q06830	0.00432	-0.238787	19	6.5	20	11	181	46.2
1841		SOD2	Superoxide dismutase [Mn], mitochondrial (EC 1.15.1.1)	P04179	0.0216	-0.111031	23.2	8.9	12	5	75.5	26.2
324	a	TF	Beta-1 metal-binding globulin (Serotransferrin) (Siderophilin)	Q06AH7	0.0255	-0.333424	76.9	7.2	13	9	105	13.2
329	b	TF	Beta-1 metal-binding globulin (Serotransferrin) (Siderophilin)	Q06AH7	0.0444	-0.400538	76.9	7	27	19	239	26.6
1233		TNNT3	Troponin T, fast skeletal muscle	P45378	0.0169	0.432959	31.8	5.6	21	7	70.9	24.9
1021		TUFM	Elongation factor Tu, mitochondrial	P49411	0.00777	0.632268	49.5	8.7	21	10	111	22.6
873		UQCRC1	Cytochrome b-c1 complex subunit 1, mitochondrial	P31930	0.043	0.344828	52.6	5.9	37	12	130	26.7
661		VIM	Vimentin	P08670	0.0057	-0.505891	53.6	4.9	58	19	139	37.8
Legend:	protein identified also in label-free LC-ESI-MS/MS dataset
